# Supplementary material for: Irritability and Emotional Impulsivity as Core Feature of ADHD and ODD in Children
Source: Springer Nature journal article supplement (doi:10.1007/s10862-022-09974-8), 2022-05-11
Supplement: MOESM1 [file 20390702]

**Supporting Information for *Irritability and Emotional Impulsivity as Core Feature of ADHD and ODD in Children***

Journal of Psychopathology and Behavioral Assessment

Michaela Junghänel, Ann-Kathrin Thöne, Claudia Ginsberg, Anja Görtz-Dorten, Franziska Frenk, Kristina Mücke, Anne-Katrin Treier, Sara Zaplana Labarga, Tobias Banaschewski, Sabina Millenet, Jörg M. Fegert, Dorothee Bernheim, Charlotte Hanisch, Michael Kölch, Anne Schüller, Ulrike Ravens-Sieberer, Anne Kaman, Veit Roessner, Julian Hinz, Manfred Döpfner on behalf of the ADOPT Consortium.

Corresponding author: Michaela Junghänel ([Michaela.junghaenel@uk-koeln.de](mailto:Michaela.junghaenel@uk-koeln.de))

School of Child and Adolescent Cognitive Behavior Therapy (AKiP), Faculty of Medicine and University Hospital Cologne, University of Cologne, Cologne, Germany

**Table S1***Criteria for Item Reduction of the DADYS Questionnaire*

| Item | Item description                                    | Skewness | Kurtosis | Not all response categories were used | > 90% not clinically relevant (response 0/1) | Number of item-item correlations < .3<br><b>(bold if &gt; 50%)</b> | Number of item-item correlations >.8 | Of those with item-item correlation > .8, additionally rated as redundant by at least 2 out of 3 clinicians | Of those that fulfill criteria for exclusion: DSM-5 criteria for DMDD? | Excluded |
|------|-----------------------------------------------------|----------|----------|---------------------------------------|----------------------------------------------|--------------------------------------------------------------------|--------------------------------------|-------------------------------------------------------------------------------------------------------------|------------------------------------------------------------------------|----------|
| 1    | Is a happy child                                    |          |          |                                       |                                              | 9                                                                  |                                      |                                                                                                             |                                                                        |          |
| 2    | Exhibits mood swings                                |          |          |                                       |                                              | 7                                                                  | 1                                    |                                                                                                             |                                                                        |          |
| 3    | Responds positively to adults                       |          |          | Yes                                   | Yes                                          | <b>32</b>                                                          |                                      |                                                                                                             |                                                                        |          |
| 4    | Switches easily between activities                  |          |          |                                       |                                              | 9                                                                  |                                      |                                                                                                             |                                                                        |          |
| 5    | Calms down after being angry                        |          |          |                                       |                                              | 12                                                                 |                                      |                                                                                                             |                                                                        |          |
| 6    | Easily frustrated                                   |          |          |                                       |                                              | 9                                                                  |                                      |                                                                                                             |                                                                        |          |
| 7    | Responds positively to peers                        |          |          | Yes                                   | Yes                                          | <b>32</b>                                                          |                                      |                                                                                                             |                                                                        |          |
| 8    | Prone to temper tantrums                            |          |          |                                       |                                              | 9                                                                  | 3                                    | Yes                                                                                                         | No                                                                     | ✓        |
| 9    | Can wait for good things                            |          |          |                                       |                                              | 11                                                                 |                                      |                                                                                                             |                                                                        |          |
| 10   | Takes pleasure in distress of others                | XX       | XX       |                                       | Yes                                          | <b>32</b>                                                          |                                      |                                                                                                             |                                                                        | ✓        |
| 11   | Can modulate excitement in high-energy situations   |          |          |                                       |                                              | 11                                                                 |                                      |                                                                                                             |                                                                        |          |
| 12   | Whiny/Clingy                                        | X        | X        |                                       | Yes                                          | <b>27</b>                                                          |                                      |                                                                                                             |                                                                        | ✓        |
| 13   | Prone to exuberant/disruptive outbursts of emotions |          |          |                                       |                                              | 7                                                                  |                                      |                                                                                                             |                                                                        |          |
| 14   | Angry about limit-setting                           |          |          |                                       |                                              | 6                                                                  |                                      |                                                                                                             |                                                                        |          |
| 15   | Verbalize emotions                                  |          |          |                                       |                                              | 14                                                                 |                                      |                                                                                                             |                                                                        |          |
| 16   | Sad/Listless                                        | X        | XX       |                                       | Yes                                          | 14                                                                 |                                      |                                                                                                             |                                                                        | ✓        |
| 17   | Overly exuberant when engaging others to play       |          |          |                                       |                                              | 18                                                                 |                                      |                                                                                                             |                                                                        |          |
| 18   | Displays flat affect                                | XX       | XX       |                                       | Yes                                          | <b>33</b>                                                          |                                      |                                                                                                             |                                                                        | ✓        |

|    |                                                       |    |    |     |     |           |   |  |     |  |     |
|----|-------------------------------------------------------|----|----|-----|-----|-----------|---|--|-----|--|-----|
| 19 | Responds negatively to friendly approaches by peers   | XX | XX | Yes | Yes | <b>34</b> |   |  |     |  | ✓   |
| 20 | Impulsive                                             |    |    |     |     | 9         |   |  |     |  |     |
| 21 | Empathetic/Caring                                     |    |    |     |     | <b>27</b> |   |  |     |  |     |
| 22 | Displays exuberance others find intrusive             |    | X  |     |     | 15        |   |  |     |  |     |
| 23 | Appropriate negative emotions when others are hostile |    |    |     |     | <b>37</b> |   |  |     |  | ✓   |
| 24 | Inappropriate emotions when engaging others in play   | X  | XX |     | Yes | 13        |   |  |     |  | ✓   |
| 25 | Demands must be met immediately                       |    |    |     |     | 7         |   |  |     |  |     |
| 26 | Quickly angry/ Temper tantrums                        |    |    |     |     | 7         | 7 |  | Yes |  | ✓   |
| 27 | Often irritable                                       |    |    |     |     | 6         | 4 |  |     |  |     |
| 28 | Often offended                                        |    |    |     |     | 7         | 1 |  |     |  |     |
| 29 | Prolonged verbally aggressive tantrums                |    |    |     |     | 8         | 1 |  | Yes |  | Yes |
| 30 | Prolonged physically aggressive tantrums              | X  | XX |     | Yes | 16        |   |  |     |  | Yes |
| 31 | Chronically irritable mood                            | X  | X  |     | Yes | 10        |   |  |     |  |     |
| 32 | Easily annoyed by others                              |    |    |     |     | 7         |   |  |     |  |     |
| 33 | Often loses temper                                    |    |    |     |     | 6         | 4 |  |     |  |     |
| 34 | Stays angry                                           |    |    |     |     | 10        |   |  |     |  |     |
| 35 | Is mostly angry                                       | X  |    | Yes | Yes | 9         |   |  |     |  |     |
| 36 | Is often angry                                        |    |    |     |     | 7         | 5 |  | Yes |  | ✓   |
| 37 | Loses temper easily                                   |    |    |     |     | 8         | 4 |  | Yes |  | ✓   |
| 38 | Irritability causes problems                          |    |    |     |     | 6         |   |  |     |  |     |

Note. X = skewness/kurtosis larger than one standard deviation. XX = skewness/kurtosis larger than two standard deviations. Excluded items are highlighted in grey.

**Table S2***Exploratory Factor Analysis of the DADYS Questionnaire*

| Item description                                    | Factor 1     | Factor 2    | Factor 3     |
|-----------------------------------------------------|--------------|-------------|--------------|
| Is a happy child                                    | -.37*        | <b>.53*</b> | .10          |
| Exhibits mood swings                                | <b>.94*</b>  | .12*        | .04          |
| Responds positively to adults                       | .07          | <b>.86*</b> | -.01         |
| Switches easily between activities                  | <b>-.45*</b> | .36*        | -.04         |
| Calms down after being angry                        | <b>-.83*</b> | .06         | -.25*        |
| Easily frustrated                                   | <b>.79*</b>  | .00         | .16*         |
| Responds positively to peers                        | -.01         | <b>.90*</b> | .10          |
| Can wait for good things                            | <b>-.61*</b> | .12         | -.14         |
| Can modulate excitement in high-energy situations   | -.41*        | .26*        | <b>-.42*</b> |
| Prone to exuberant/disruptive outbursts of emotions | .61*         | -.15*       | <b>.30*</b>  |
| Angry about limit-setting                           | <b>.81*</b>  | .03         | .10          |
| Verbalizes emotions                                 | -.19*        | <b>.40*</b> | -.17         |
| Overly exuberant when engaging others to play       | .15*         | .02         | <b>.71*</b>  |
| Impulsive                                           | <b>.70*</b>  | .08         | .31*         |
| Empathetic/Caring                                   | -.01         | <b>.61*</b> | -.08         |
| Displays exuberance others find intrusive           | .01          | -.13        | <b>.89*</b>  |
| Demands must be met immediately                     | <b>.71*</b>  | -.02        | .22*         |
| Often irritable                                     | <b>.99*</b>  | .09         | .01          |
| Often offended                                      | <b>.95*</b>  | .05         | .01          |
| Prolonged verbally aggressive temper tantrums       | <b>1.02*</b> | .24*        | -.09         |
| Prolonged physically aggressive tantrums            | <b>.80*</b>  | .07         | -.00         |
| Chronically irritable mood                          | <b>.72*</b>  | -.23*       | -.18*        |
| Easily annoyed by others                            | <b>.75*</b>  | .00         | .19*         |
| Often loses temper                                  | <b>.93*</b>  | .02         | .06          |
| Stays angry                                         | <b>.98*</b>  | .00         | -.39*        |
| Is mostly angry                                     | <b>.75*</b>  | -.28*       | -.18*        |
| Irritability causes problems                        | <b>.61*</b>  | -.17*       | .34*         |

*Note.* The extraction method was principal axis factoring with an oblique (GEOMIN) rotation.

Assigned items are marked in bold.

**Table S3**

*Standardized Factor Loadings (Standard Error) for the Confirmatory Factor Analysis of the Correlated Factors Models with Three AD Factors*

| Item                                                | Factor loading (SE) |
|-----------------------------------------------------|---------------------|
| <b>AD- Irritability/Emotional Impulsivity</b>       |                     |
| Exhibits mood swings                                | .89* (.02)          |
| Switches easily between activities                  | .59* (.05)          |
| Calms down after being angry <sup>a</sup>           | .63* (.05)          |
| Easily frustrated                                   | .77* (.04)          |
| Can wait for good things                            | .70* (.04)          |
| Angry about limit-setting                           | .78* (.03)          |
| Impulsive                                           | .81* (.03)          |
| Demands must be met immediately                     | .77* (.04)          |
| Often irritable                                     | .98* (.01)          |
| Often offended                                      | .93* (.01)          |
| Prolonged verbally aggressive tantrums              | .87* (.02)          |
| Prolonged physically aggressive tantrums            | .68* (.04)          |
| Chronically irritable mood                          | .80* (.03)          |
| Easily annoyed by others                            | .84* (.03)          |
| Often loses temper                                  | .93* (.02)          |
| Stays angry <sup>a</sup>                            | .77* (.03)          |
| Is mostly angry                                     | .81* (.03)          |
| Irritability causes problems                        | .87* (.02)          |
| <b>AD-Positive Emotionality</b>                     |                     |
| Is a happy child                                    | -.84* (.06)         |
| Responds positively to adults <sup>b</sup>          | -.36* (.09)         |
| Responds positively to peers <sup>b</sup>           | -.35* (.09)         |
| Verbalizes emotions                                 | -.66* (.06)         |
| Empathetic/caring                                   | -.60* (.06)         |
| <b>AD-Exuberance</b>                                |                     |
| Can modulate excitement in high-energy situations   | .81* (.04)          |
| Prone to exuberant/disruptive outbursts of emotions | .96* (.02)          |
| Overly exuberant when engaging others to play       | .70* (.05)          |
| Displays exuberance others find intrusive           | .81* (.03)          |
| <b>Residual correlations</b>                        |                     |
| a                                                   | .67*                |
| b                                                   | .70*                |

*Note.* SE = standard error. AD = affective dysregulation.

\* =  $p < .001$ .

<sup>a,b</sup> Residuals of these items were allowed to correlate.

**Table S4**

*Standardized Factor Loadings (Standard Error) for the Unidimensional Model (Uni), the First-Order Correlated Factor Model (CFO) and Original Standardized Factor Loadings for the Second-Order Correlated Factor Model (SOF) before the Schmid-Leiman Transformation*

| Item                                                | Uni         | CFO        | SOF        |
|-----------------------------------------------------|-------------|------------|------------|
| <b>AD- Irritability/Emotional Impulsivity</b>       |             |            |            |
| Exhibits mood swings                                | .86* (.02)  | .89* (.02) | .89* (.02) |
| Switches easily between activities                  | .59* (.03)  | .63* (.04) | .62* (.04) |
| Calms down after being angry <sup>a</sup>           | .61* (.03)  | .65* (.04) | .65* (.04) |
| Easily frustrated                                   | .79* (.02)  | .82* (.02) | .82* (.02) |
| Can wait for good things                            | .71* (.03)  | .75* (.03) | .75* (.03) |
| Angry about limit-setting                           | .80* (.02)  | .83* (.02) | .83* (.02) |
| Impulsive                                           | .79* (.02)  | .83* (.02) | .83* (.02) |
| Demands must be met immediately                     | .77* (.03)  | .80* (.03) | .80* (.03) |
| Often irritable                                     | .94* (.01)  | .96* (.01) | .96* (.01) |
| Often offended                                      | .90* (.01)  | .92* (.01) | .92* (.01) |
| Prolonged verbally aggressive tantrums              | .81* (.02)  | .84* (.02) | .84* (.02) |
| Prolonged physically aggressive tantrums            | .65* (.03)  | .69* (.03) | .69* (.03) |
| Chronically irritable mood                          | .71* (.03)  | .75* (.03) | .75* (.03) |
| Easily annoyed by others                            | .81* (.02)  | .84* (.02) | .84* (.02) |
| Often loses temper                                  | .91* (.01)  | .94* (.01) | .94* (.01) |
| Stays angry <sup>a</sup>                            | .70* (.03)  | .74* (.03) | .74* (.03) |
| Is mostly angry                                     | .74* (.03)  | .78* (.03) | .78* (.03) |
| Irritability causes problems                        | .85* (.02)  | .89* (.02) | .89* (.02) |
| <b>AD-Positive Emotionality</b>                     |             |            |            |
| Is a happy child                                    | -.56* (.04) | .81* (.04) | .81* (.04) |
| Responds positively to adults <sup>b</sup>          | -.31* (.05) | .46* (.07) | .46* (.07) |
| Responds positively to peers <sup>b</sup>           | -.30* (.05) | .46* (.07) | .45* (.07) |
| Verbalizes emotions                                 | -.50* (.04) | .71* (.05) | .72* (.05) |
| Empathetic/caring                                   | -.44* (.04) | .63* (.05) | .63* (.05) |
| <b>AD-Exuberance</b>                                |             |            |            |
| Can modulate excitement in high-energy situations   | .72* (.03)  | .83* (.03) | .83* (.03) |
| Prone to exuberant/disruptive outbursts of emotions | .82* (.02)  | .94* (.02) | .95* (.02) |
| Overly exuberant when engaging others to play       | .58* (.04)  | .66* (.04) | .65* (.04) |
| Displays exuberance others find intrusive           | .68* (.03)  | .78* (.03) | .77* (.03) |
| <b>ADHD-Inattention</b>                             |             |            |            |
| Overlooks details                                   | .72* (.03)  | .82* (.02) | .81* (.02) |
| Sustained attention                                 | .81* (.02)  | .90* (.02) | .90* (.02) |
| Does not listen                                     | .72* (.03)  | .82* (.03) | .82* (.03) |
| Incomplete execution of tasks                       | .82* (.02)  | .91* (.02) | .91* (.02) |
| Difficulties with organization                      | .77* (.02)  | .86* (.02) | .86* (.02) |
| Aversion to cognitive effort                        | .80* (.02)  | .90* (.02) | .90* (.02) |
| Loses things                                        | .65* (.03)  | .75* (.03) | .75* (.03) |

|                                   |            |            |            |
|-----------------------------------|------------|------------|------------|
| Easily distracted                 | .83*(.02)  | .92* (.02) | .93* (.02) |
| Forgetful                         | .74* (.03) | .83* (.02) | .83* (.02) |
| <hr/>                             |            |            |            |
| ADHD-Hyperactivity/Impulsivity    |            |            |            |
| Fidgets/squirms                   | .73* (.03) | .80* (.02) | .80* (.03) |
| Gets up                           | .72* (.03) | .79* (.03) | .79* (.03) |
| Walks/climbs                      | .80* (.03) | .86* (.02) | .86* (.02) |
| Inner restlessness                | .69* (.04) | .77* (.04) | .77* (.04) |
| Difficulties playing quietly      | .79* (.03) | .87* (.02) | .87* (.02) |
| Extreme agitation                 | .86* (.02) | .92* (.02) | .93* (.02) |
| Frequently on the go              | .80* (.03) | .87* (.02) | .87* (.02) |
| Blurts                            | .73* (.03) | .81* (.03) | .81* (.03) |
| Difficulties waiting for own turn | .78* (.02) | .87* (.02) | .87* (.02) |
| Interrupts/disturbs               | .81* (.02) | .91* (.02) | .91* (.02) |
| Talks a lot                       | .62* (.03) | .70* (.04) | .70* (.04) |
| <hr/>                             |            |            |            |
| ODD-D                             |            |            |            |
| Argues with adults                | .76* (.02) | .86* (.02) | .86* (.02) |
| Does not follow rules             | .81* (.02) | .91* (.02) | .92* (.02) |
| Annoys others                     | .71* (.03) | .81* (.03) | .81* (.03) |
| Accuses others                    | .75* (.02) | .86* (.02) | .87* (.02) |
| Spiteful/vindictive               | .61* (.04) | .70* (.04) | .69* (.04) |
| <hr/>                             |            |            |            |
| Residual correlations             |            |            |            |
| a                                 | .68*       | .65*       | .65*       |
| b                                 | .73*       | .69*       | .70*       |

*Note.* CFO = first-order correlated factor model, SOF = second-order correlated factor model,

AD = affective dysregulation, ADHD = attention-deficit/hyperactivity disorder, ODD-D = oppositional defiant disorder – only defiant dimension.

\* =  $p < .001$ .

<sup>a,b</sup> Residuals of these items were allowed to correlate.

**Table S5**

*Standardized Factor Loadings (Standard Error) of the First-Order Factors on the Second-Order Factor and Residual Variances (Standard Error) for the Second-Order Correlated Factor Model (SFO)*

| Dimension                             | Factor Loading on Second-Order Factor | Residual Variance |
|---------------------------------------|---------------------------------------|-------------------|
| External                              |                                       |                   |
| AD-Irritability/Emotional Impulsivity | .90* (.01)                            | .20* (.03)        |
| AD-Positive Emotionality              | -.70* (.04)                           | .51* (.05)        |
| AD-Exuberance                         | .91* (.02)                            | .18* (.04)        |
| ADHD-Inattention                      | .81* (.02)                            | .34* (.04)        |
| ADHD-Hyperactivity/Impulsivity        | .86* (.02)                            | .27* (.03)        |
| ODD-D                                 | .89* (.02)                            | .20* (.03)        |

*Note.* AD = affective dysregulation, ADHD = attention-deficit/hyperactivity disorder, ODD-

D = oppositional defiant disorder – only defiant dimension.

\* =  $p < .001$ .



**Table S6**

*Standardized Factor Loadings as Obtained by Applying the Schmid-Leiman Transformation to the Second-Order Factor Model*

| Item                                                | Item Loading on<br>2 <sup>nd</sup> -order factor (g) | Item Loading on<br>1 <sup>st</sup> -order factor (s) |
|-----------------------------------------------------|------------------------------------------------------|------------------------------------------------------|
| <b>AD- Irritability/Emotional Impulsivity</b>       |                                                      |                                                      |
| Exhibits mood swings                                | .79                                                  | .39                                                  |
| Switches easily between activities                  | .56                                                  | .28                                                  |
| Calms down after being angry <sup>a</sup>           | .58                                                  | .29                                                  |
| Easily frustrated                                   | .73                                                  | .36                                                  |
| Can wait for good things                            | .67                                                  | .33                                                  |
| Angry about limit-setting                           | .75                                                  | .37                                                  |
| Impulsive                                           | .74                                                  | .37                                                  |
| Demands must be met immediately                     | .72                                                  | .36                                                  |
| Often irritable                                     | .86                                                  | .43                                                  |
| Often offended                                      | .82                                                  | .41                                                  |
| Prolonged verbally aggressive tantrums              | .75                                                  | .37                                                  |
| Prolonged physically aggressive tantrums            | .62                                                  | .31                                                  |
| Chronically irritable mood                          | .67                                                  | .33                                                  |
| Easily annoyed by others                            | .75                                                  | .37                                                  |
| Often loses temper                                  | .84                                                  | .42                                                  |
| Stays angry <sup>a</sup>                            | .66                                                  | .33                                                  |
| Is mostly angry                                     | .70                                                  | .35                                                  |
| Irritability causes problems                        | .79                                                  | .39                                                  |
| M (SD)                                              | .72 (.08)                                            | .36 (.04)                                            |
| Ratio (g/s)                                         |                                                      | 2.01                                                 |
| <b>AD-Positive Emotionality</b>                     |                                                      |                                                      |
| Is a happy child                                    | -.57                                                 | .57                                                  |
| Responds positively to adults <sup>b</sup>          | -.32                                                 | .33                                                  |
| Responds positively to peers <sup>b</sup>           | -.31                                                 | .32                                                  |
| Verbalizes emotions                                 | -.50                                                 | .51                                                  |
| Empathetic/caring                                   | -.44                                                 | .45                                                  |
| M (SD)                                              | -.43 (.11)                                           | .44 (.11)                                            |
| Ratio (g/s)                                         |                                                      | -.98                                                 |
| <b>AD-Exuberance</b>                                |                                                      |                                                      |
| Can modulate excitement in high-energy situations   | .75                                                  | .35                                                  |
| Prone to exuberant/disruptive outbursts of emotions | .86                                                  | .40                                                  |
| Overly exuberant when engaging others to play       | .59                                                  | .28                                                  |
| Displays exuberance others find intrusive           | .70                                                  | .32                                                  |
| M (SD)                                              | .73 (.11)                                            | .34 (.05)                                            |
| Ratio (g/s)                                         |                                                      | 2.16                                                 |
| <b>ADHD-Inattention</b>                             |                                                      |                                                      |
| Overlooks details                                   | .66                                                  | .47                                                  |
| Sustained attention                                 | .73                                                  | .52                                                  |
| Does not listen                                     | .67                                                  | .48                                                  |
| Incomplete execution of tasks                       | .74                                                  | .53                                                  |
| Difficulties with organization                      | .70                                                  | .50                                                  |
| Aversion to cognitive effort                        | .73                                                  | .52                                                  |
| Loses things                                        | .61                                                  | .43                                                  |
| Easily distracted                                   | .75                                                  | .54                                                  |
| Forgetful                                           | .67                                                  | .48                                                  |

|                                   |           |           |
|-----------------------------------|-----------|-----------|
| M ( <i>SD</i> )                   | .70 (.05) | .50 (.04) |
| Ratio (g/s)                       |           | 1.40      |
| <hr/>                             |           |           |
| ADHD-Hyperactivity/Impulsivity    |           |           |
| Fidgets/squirms                   | .69       | .41       |
| Gets up                           | .68       | .41       |
| Walks/climbs                      | .74       | .45       |
| Inner restlessness                | .66       | .40       |
| Difficulties playing quietly      | .75       | .44       |
| Extreme agitation                 | .79       | .48       |
| Frequently on the go              | .75       | .45       |
| Blurts                            | .70       | .42       |
| Difficulties waiting for own turn | .75       | .45       |
| Interrupts/disturbs               | .78       | .47       |
| Talks a lot                       | .60       | .36       |
| M ( <i>SD</i> )                   | .72 (.06) | .43 (.03) |
| Ratio (g/s)                       |           | 1.66      |
| <hr/>                             |           |           |
| ODD-D                             |           |           |
| Argues with adults                | .74       | .37       |
| Does not follow rules             | .82       | .41       |
| Annoys others                     | .72       | .36       |
| Accuses others                    | .77       | .39       |
| Spiteful/vindictive               | .62       | .31       |
| M ( <i>SD</i> )                   | .73 (.07) | .37 (.04) |
| Ratio (g/s)                       |           | 1.99      |
| <hr/>                             |           |           |
| Total M( <i>SD</i> )              | .61 (.35) | .30 (.07) |

*Note.* M = mean, *SD* = standard deviation, AD = affective dysregulation, ADHD = attention-

deficit/hyperactivity disorder, ODD-D = oppositional defiant disorder – only defiant dimension.

<sup>a,b</sup> Residuals of these items were allowed to correlate.

**Table S7**

*Standardized Factor Loadings (Standard Error), Omega Statistics and Explained Common Variance for the Bifactor Model (BI)*

| Item                                         | G<br>External | S<br>AD-II | S<br>AD-PE | S<br>AD-EX | S<br>ADHD-IN | S<br>ADHD-HI | S<br>ODD-D |
|----------------------------------------------|---------------|------------|------------|------------|--------------|--------------|------------|
| <b>AD-Irritability/Emotional Impulsivity</b> |               |            |            |            |              |              |            |
| Exhibits mood swings                         | .77* (.03)    | .46* (.04) |            |            |              |              |            |
| Switches easily between activities           | .58* (.04)    | .21* (.06) |            |            |              |              |            |
| Calms down after being angry <sup>a</sup>    | .56* (.04)    | .38* (.05) |            |            |              |              |            |
| Easily frustrated                            | .75* (.03)    | .31* (.04) |            |            |              |              |            |
| Can wait for good things                     | .73* (.03)    | .09 (.06)  |            |            |              |              |            |
| Angry about limit-setting                    | .79* (.03)    | .21* (.04) |            |            |              |              |            |
| Impulsive                                    | .79* (.02)    | .18* (.05) |            |            |              |              |            |
| Demands must be met immediately              | .75* (.03)    | .23* (.05) |            |            |              |              |            |
| Often irritable                              | .85* (.02)    | .45* (.04) |            |            |              |              |            |
| Often offended                               | .80* (.02)    | .47* (.04) |            |            |              |              |            |
| Prolonged verbally aggressive tantrums       | .69* (.03)    | .56* (.04) |            |            |              |              |            |
| Prolonged physically aggressive tantrums     | .56* (.04)    | .49* (.06) |            |            |              |              |            |
| Chronically irritable mood                   | .60* (.04)    | .55* (.05) |            |            |              |              |            |
| Easily annoyed by others                     | .77* (.03)    | .31* (.04) |            |            |              |              |            |
| Often loses temper                           | .84* (.02)    | .40* (.04) |            |            |              |              |            |
| Stays angry <sup>a</sup>                     | .58* (.04)    | .57* (.04) |            |            |              |              |            |
| Is mostly angry                              | .60* (.04)    | .64* (.06) |            |            |              |              |            |
| Irritability causes problems                 | .84* (.02)    | .22* (.04) |            |            |              |              |            |
| <b>AD-Positive Emotionality</b>              |               |            |            |            |              |              |            |
| Is a happy child                             | -.57* (.04)   |            | .46* (.06) |            |              |              |            |
| Responds positively to adults <sup>b</sup>   | -.32* (.06)   |            | .46* (.07) |            |              |              |            |
| Responds positively to peers <sup>b</sup>    | -.30* (.06)   |            | .55* (.07) |            |              |              |            |
| Verbalizes emotions                          | -.51* (.04)   |            | .39* (.06) |            |              |              |            |

|                                                     |             |            |            |
|-----------------------------------------------------|-------------|------------|------------|
| Empathetic/caring                                   | -.44* (.05) | .54* (.06) |            |
| <hr/>                                               |             |            |            |
| AD-Exuberance                                       |             |            |            |
| Can modulate excitement in high-energy situations   | .76* (.03)  | .10 (.06)  |            |
| Prone to exuberant/disruptive outbursts of emotions | .86* (.02)  | .17* (.05) |            |
| Overly exuberant when engaging others to play       | .58* (.04)  | .45* (.09) |            |
| Displays exuberance others find intrusive           | .69* (.04)  | .81* (.15) |            |
| <hr/>                                               |             |            |            |
| ADHD-Inattention                                    |             |            |            |
| Overlooks details                                   | .65* (.03)  | .53* (.04) |            |
| Sustained attention                                 | .74* (.03)  | .49* (.04) |            |
| Does not listen                                     | .68* (.04)  | .41* (.04) |            |
| Incomplete execution of tasks                       | .74* (.03)  | .52* (.04) |            |
| Difficulties with organization                      | .67* (.03)  | .60* (.04) |            |
| Aversion to cognitive effort                        | .76* (.03)  | .40* (.04) |            |
| Loses things                                        | .56* (.04)  | .59* (.04) |            |
| Easily distracted                                   | .78* (.03)  | .45* (.04) |            |
| Forgetful                                           | .64* (.03)  | .58* (.04) |            |
| <hr/>                                               |             |            |            |
| ADHD-Hyperactivity/Impulsivity                      |             |            |            |
| Fidgets/squirms                                     | .66* (.03)  | .52* (.04) |            |
| Gets up                                             | .66* (.04)  | .47* (.05) |            |
| Walks/climbs                                        | .70* (.04)  | .56* (.05) |            |
| Inner restlessness                                  | .65* (.04)  | .43* (.06) |            |
| Difficulties playing quietly                        | .74* (.03)  | .45* (.04) |            |
| Extreme agitation                                   | .77* (.03)  | .54* (.04) |            |
| Frequently on the go                                | .72* (.03)  | .53* (.04) |            |
| Blurts                                              | .72* (.03)  | .35* (.05) |            |
| Difficulties waiting for own turn                   | .79* (.03)  | .27* (.05) |            |
| Interrupts/disturbs                                 | .82* (.02)  | .25* (.04) |            |
| Talks a lot                                         | .61* (.04)  | .31* (.05) |            |
| <hr/>                                               |             |            |            |
| ODD-Defiant Dimension                               |             |            |            |
| Argues with adults                                  | .77* (.03)  |            | .41* (.04) |

|                         |            |     |     |     |     |     |            |
|-------------------------|------------|-----|-----|-----|-----|-----|------------|
| Does not follow rules   | .82* (.02) |     |     |     |     |     | .44* (.05) |
| Annoys others           | .72* (.03) |     |     |     |     |     | .46* (.06) |
| Accuses others          | .78* (.03) |     |     |     |     |     | .20* (.05) |
| Spiteful/vindictive     | .62* (.05) |     |     |     |     |     | .38* (.08) |
| $\omega$                | .99        | .98 | .78 | .92 | .97 | .96 | .92        |
| $\omega$ H/ $\omega$ HS | .89        | .21 | .44 | .20 | .32 | .25 | .19        |
| ECV                     | .71        | .08 | .03 | .03 | .07 | .06 | .02        |

*Note.* G = general factor, S = specific factor, AD = affective dysregulation,  $\Pi$  = irritability/emotional impulsivity, PE = positive emotionality, EX = exuberance, ADHD = attention-deficit/hyperactivity disorder, ODD-D = oppositional defiant disorder – only defiant dimension,  $\omega$  = omega (amount of variance accounted for by the g- and s-factors taken together),  $\omega$ H = omega hierarchical (amount of variance accounted for by the g-factor),  $\omega$ HS = omega hierarchical subscale (amount of variance accounted for by the s-factors), ECV = explained common variance (proportion of all common variance explained by that factor; for specific factors, the ECV computes the strength of a specific factor relative to all explained variance only of all items, even those not loading on the specific factor).

\* =  $p < .001$ .

<sup>a,b</sup> Residuals of these items were allowed to correlate.

**Table S8***Standardized Factor Loadings (Standard Error) for the Bifactor S-1 Model (BI S-1) with AD-II as Reference Factor*

| Item                                         | Reference<br>AD-II | S<br>AD-PE | S<br>AD-EX | S<br>ADHD-IN | S<br>ADHD-HI | S<br>ODD-D |
|----------------------------------------------|--------------------|------------|------------|--------------|--------------|------------|
| <b>AD-Irritability/Emotional Impulsivity</b> |                    |            |            |              |              |            |
| Exhibits mood swings                         | .89* (.02)         |            |            |              |              |            |
| Switches easily between activities           | .63* (.04)         |            |            |              |              |            |
| Calms down after being angry <sup>a</sup>    | .65* (.04)         |            |            |              |              |            |
| Easily frustrated                            | .82* (.02)         |            |            |              |              |            |
| Can wait for good things                     | .75* (.03)         |            |            |              |              |            |
| Angry about limit-setting                    | .83* (.02)         |            |            |              |              |            |
| Impulsive                                    | .83* (.02)         |            |            |              |              |            |
| Demands must be met immediately              | .80* (.03)         |            |            |              |              |            |
| Often irritable                              | .96* (.01)         |            |            |              |              |            |
| Often offended                               | .92* (.01)         |            |            |              |              |            |
| Prolonged verbally aggressive tantrums       | .84* (.02)         |            |            |              |              |            |
| Prolonged physically aggressive tantrums     | .69* (.03)         |            |            |              |              |            |
| Chronically irritable mood                   | .74* (.03)         |            |            |              |              |            |
| Easily annoyed by others                     | .84* (.02)         |            |            |              |              |            |
| Often loses temper                           | .93* (.01)         |            |            |              |              |            |
| Stays angry <sup>a</sup>                     | .74* (.03)         |            |            |              |              |            |
| Is mostly angry                              | .78* (.03)         |            |            |              |              |            |
| Irritability causes problems                 | .89* (.02)         |            |            |              |              |            |
| <b>AD-Positive Emotionality</b>              |                    |            |            |              |              |            |
| Is a happy child                             | -.59* (.04)        | .49* (.06) |            |              |              |            |
| Responds positively to adults <sup>b</sup>   | -.33* (.06)        | .45* (.07) |            |              |              |            |
| Responds positively to peers <sup>b</sup>    | -.32* (.06)        | .56* (.07) |            |              |              |            |
| Verbalizes emotions                          | -.52* (.04)        | .33* (.07) |            |              |              |            |

|                                                     |             |            |            |
|-----------------------------------------------------|-------------|------------|------------|
| Empathetic/caring                                   | -.45* (.05) | .49* (.07) |            |
| <hr/>                                               |             |            |            |
| AD-Exuberance                                       |             |            |            |
| Can modulate excitement in high-energy situations   | .72* (.03)  |            | .31* (.06) |
| Prone to exuberant/disruptive outbursts of emotions | .82* (.02)  |            | .30* (.05) |
| Overly exuberant when engaging others to play       | .50* (.05)  |            | .59* (.05) |
| Displays exuberance others find intrusive           | .57* (.04)  |            | .77* (.05) |
| <hr/>                                               |             |            |            |
| ADHD-Inattention                                    |             |            |            |
| Overlooks details                                   | .57* (.04)  |            | .60* (.04) |
| Sustained attention                                 | .63* (.04)  |            | .65* (.03) |
| Does not listen                                     | .59* (.04)  |            | .55* (.04) |
| Incomplete execution of tasks                       | .64* (.03)  |            | .65* (.03) |
| Difficulties with organization                      | .56* (.04)  |            | .69* (.03) |
| Aversion to cognitive effort                        | .68* (.03)  |            | .52* (.03) |
| Loses things                                        | .47* (.04)  |            | .63* (.04) |
| Easily distracted                                   | .68* (.03)  |            | .59* (.03) |
| Forgetful                                           | .54* (.04)  |            | .67* (.03) |
| <hr/>                                               |             |            |            |
| ADHD-Hyperactivity/Impulsivity                      |             |            |            |
| Fidgets/squirms                                     | .54* (.04)  |            | .63* (.03) |
| Gets up                                             | .54* (.04)  |            | .63* (.04) |
| Walks/climbs                                        | .57* (.04)  |            | .71* (.03) |
| Inner restlessness                                  | .55* (.04)  |            | .54* (.05) |
| Difficulties playing quietly                        | .62* (.04)  |            | .61* (.04) |
| Extreme agitation                                   | .66* (.03)  |            | .65* (.03) |
| Frequently on the go                                | .61* (.04)  |            | .64* (.04) |
| Blurts                                              | .61* (.04)  |            | .53* (.04) |
| Difficulties waiting for own turn                   | .70* (.03)  |            | .45* (.04) |
| Interrupts/disturbs                                 | .72* (.03)  |            | .49* (.04) |
| Talks a lot                                         | .52* (.04)  |            | .47* (.05) |
| <hr/>                                               |             |            |            |
| ODD-Defiant Dimension                               |             |            |            |
| Argues with adults                                  | .73* (.03)  |            | .45* (.04) |

|                       |            |            |
|-----------------------|------------|------------|
| Does not follow rules | .78* (.02) | .51* (.05) |
| Annoys others         | .68* (.03) | .49* (.05) |
| Accuses others        | .75* (.03) | .33* (.05) |
| Spiteful/vindictive   | .60* (.04) | .39* (.07) |

*Note.* S = specific factor, AD = affective dysregulation, II = irritability/emotional impulsivity, PE = positive emotionality, EX = exuberance, ADHD = attention-deficit/hyperactivity disorder, IN = inattention, HI = hyperactivity/impulsivity, ODD-D = oppositional defiant disorder – only defiant dimension.

\* =  $p < .001$ .

<sup>a,b</sup> Residuals of these items were allowed to correlate.



**Table S9***Residual Correlations in the Bifactor S-1 Model (BI S-1) with AD-II as Reference Factor*

| Variable   | 1   | 2    | 3    | 4    | 5    | 6 |
|------------|-----|------|------|------|------|---|
| 1. AD-II   | –   |      |      |      |      |   |
| 2. AD-PE   | n/a | –    |      |      |      |   |
| 3. AD-EX   | n/a | .16  | –    |      |      |   |
| 4. ADHD-IN | n/a | -.05 | .27* | –    |      |   |
| 5. ADHD-HI | n/a | .13  | .56* | .58* | –    |   |
| 6. ODD-D   | n/a | -.08 | .09  | .19* | .25* | – |

*Note.* AD = affective dysregulation, II = irritability/emotional impulsivity, PE = positive emotionality, EX = exuberance, ADHD = attention-deficit/hyperactivity disorder, IN = inattention, HI = hyperactivity/impulsivity, ODD-D = oppositional defiant disorder – only defiant dimension.

\* =  $p < .05$ .

n/a = not applicable, as correlations between the reference factor and the specific factors were restrained to 0.

**Table S10**

*(Residual) Correlations of the Bifactor S-1 Model (BI S-1) Factors with AD-II as Reference Factor with External Correlates*

| Factor BI S-1 model      | PROMIS | FRUST-A | FRUST-M |
|--------------------------|--------|---------|---------|
| AD-II (Reference factor) | .90*   | -.71*   | .82*    |
| AD-PE                    | .08*   | .46*    | -.11*   |
| AD-EX                    | -.09*  | .10     | -.18*   |
| ADHD-IN                  | -.11*  | -.05    | -.08*   |
| ADHD-HI                  | -.14*  | .02     | -.10*   |
| ODD-D                    | -.04   | .00     | .09*    |
| PROMIS                   |        | -.59*   | .74*    |
| FRUST-A                  |        |         | -.77*   |

*Note.* AD = affective dysregulation, II = irritability/emotional impulsivity, PE = positive emotionality, EX = exuberance, ADHD = attention-deficit/hyperactivity disorder, IN = inattention, HI = hyperactivity/impulsivity, ODD-D = oppositional defiant disorder – only defiant dimension.

\* =  $p < .05$ . PROMIS = Patient-Reported Outcomes Measurement Information System – Parent Proxy Anger Scale, A = adaptive, M = maladaptive

**Table S11**

*Standardized Factor Loadings (Standard Error) for the Bifactor S-1 Model (BI S-1; ODD-D) with ODD-D as Reference Factor*

| Item                                         | Reference<br>ODD-D | S<br>AD-II | S<br>AD-PE | S<br>AD-EX | S<br>ADHD-IN | S<br>ADHD-HI |
|----------------------------------------------|--------------------|------------|------------|------------|--------------|--------------|
| <b>AD-Irritability/Emotional Impulsivity</b> |                    |            |            |            |              |              |
| Exhibits mood swings                         | .82* (.03)         | .36* (.05) |            |            |              |              |
| Switches easily between activities           | .59* (.04)         | .22* (.06) |            |            |              |              |
| Calms down after being angry <sup>a</sup>    | .59* (.04)         | .36* (.06) |            |            |              |              |
| Easily frustrated                            | .79* (.03)         | .19* (.06) |            |            |              |              |
| Can wait for good things                     | .76* (.03)         | -.05 (.07) |            |            |              |              |
| Angry about limit-setting                    | .81* (.03)         | .12 (.05)  |            |            |              |              |
| Impulsive                                    | .83* (.02)         | -.01 (.06) |            |            |              |              |
| Demands must be met immediately              | .79* (.03)         | .10 (.06)  |            |            |              |              |
| Often irritable                              | .90* (.02)         | .33* (.04) |            |            |              |              |
| Often offended                               | .86* (.02)         | .36* (.04) |            |            |              |              |
| Prolonged verbally aggressive tantrums       | .76* (.03)         | .44* (.05) |            |            |              |              |
| Prolonged physically aggressive tantrums     | .62* (.04)         | .39* (.07) |            |            |              |              |
| Chronically irritable mood                   | .65* (.04)         | .55* (.05) |            |            |              |              |
| Easily annoyed by others                     | .81* (.03)         | .17* (.06) |            |            |              |              |
| Often loses temper                           | .89* (.02)         | .26* (.05) |            |            |              |              |
| Stays angry <sup>a</sup>                     | .64* (.04)         | .53* (.05) |            |            |              |              |
| Is mostly angry                              | .66* (.04)         | .57* (.06) |            |            |              |              |
| Irritability causes problems                 | .88* (.02)         | .07 (.05)  |            |            |              |              |
| <b>AD-Positive Emotionality</b>              |                    |            |            |            |              |              |
| Is a happy child                             | -.55* (.04)        |            | .74* (.08) |            |              |              |
| Responds positively to adults <sup>b</sup>   | -.31* (.06)        |            | .39* (.07) |            |              |              |
| Responds positively to peers <sup>b</sup>    | -.30* (.06)        |            | .49* (.08) |            |              |              |
| Verbalizes emotions                          | -.51* (.04)        |            | .27* (.07) |            |              |              |

|                                                     |             |            |
|-----------------------------------------------------|-------------|------------|
| Empathetic/caring                                   | -.44* (.05) | .34* (.07) |
| <hr/>                                               |             |            |
| AD-Exuberance                                       |             |            |
| Can modulate excitement in high-energy situations   | .74* (.03)  | .20* (.07) |
| Prone to exuberant/disruptive outbursts of emotions | .84* (.02)  | .19* (.05) |
| Overly exuberant when engaging others to play       | .53* (.05)  | .56* (.06) |
| Displays exuberance others find intrusive           | .62* (.04)  | .79* (.08) |
| <hr/>                                               |             |            |
| ADHD-Inattention                                    |             |            |
| Overlooks details                                   | .60* (.04)  | .56* (.04) |
| Sustained attention                                 | .67* (.03)  | .60* (.04) |
| Does not listen                                     | .63* (.04)  | .49* (.04) |
| Incomplete execution of tasks                       | .68* (.03)  | .60* (.03) |
| Difficulties with organization                      | .61* (.04)  | .66* (.03) |
| Aversion to cognitive effort                        | .72* (.03)  | .47* (.04) |
| Loses things                                        | .51* (.04)  | .61* (.04) |
| Easily distracted                                   | .72* (.03)  | .54* (.03) |
| Forgetful                                           | .58* (.04)  | .63* (.04) |
| <hr/>                                               |             |            |
| ADHD-Hyperactivity/Impulsivity                      |             |            |
| Fidgets/squirms                                     | .61* (.04)  | .57* (.04) |
| Gets up                                             | .60* (.04)  | .57* (.04) |
| Walks/climbs                                        | .64* (.04)  | .64* (.04) |
| Inner restlessness                                  | .61* (.04)  | .47* (.05) |
| Difficulties playing quietly                        | .69* (.04)  | .53* (.04) |
| Extreme agitation                                   | .73* (.03)  | .57* (.04) |
| Frequently on the go                                | .68* (.04)  | .57* (.04) |
| Blurts                                              | .67* (.04)  | .46* (.04) |
| Difficulties waiting for own turn                   | .75* (.03)  | .36* (.04) |
| Interrupts/disturbs                                 | .78* (.03)  | .39* (.04) |
| Talks a lot                                         | .57* (.04)  | .40* (.05) |
| <hr/>                                               |             |            |
| ODD-Defiant Dimension                               |             |            |

|                       |            |
|-----------------------|------------|
| Argues with adults    | .80* (.02) |
| Does not follow rules | .85* (.02) |
| Annoys others         | .75* (.03) |
| Accuses others        | .79* (.02) |
| Spiteful/vindictive   | .65* (.04) |

---

*Note.* S = specific factor, ODD-D = oppositional defiant disorder – only defiant dimension, AD = affective dysregulation, II = irritability/emotional impulsivity,

PE = positive emotionality, EX = exuberance, ADHD = attention-deficit/hyperactivity disorder, IN = inattention, HI = hyperactivity/impulsivity.

\* =  $p < .001$ .

<sup>a,b</sup> Residuals of these items were allowed to correlate.

**Table S12**

*Standardized Factor Loadings (Standard Error) for the Bifactor S-1 Model (BI S-1; ADHD-IN) with ADHD-IN as Reference Factor*

| Item                                         | Reference<br>ADHD-IN | S<br>AD-II | S<br>AD-PE | S<br>AD-EX | S<br>ADHD-HI | S<br>ODD-D |
|----------------------------------------------|----------------------|------------|------------|------------|--------------|------------|
| <b>AD-Irritability/Emotional Impulsivity</b> |                      |            |            |            |              |            |
| Exhibits mood swings                         | .60* (.04)           | .66* (.03) |            |            |              |            |
| Switches easily between activities           | .47* (.04)           | .41* (.05) |            |            |              |            |
| Calms down after being angry <sup>a</sup>    | .41* (.05)           | .54* (.04) |            |            |              |            |
| Easily frustrated                            | .63* (.04)           | .51* (.04) |            |            |              |            |
| Can wait for good things                     | .64* (.04)           | .36* (.04) |            |            |              |            |
| Angry about limit-setting                    | .63* (.04)           | .54* (.04) |            |            |              |            |
| Impulsive                                    | .67* (.04)           | .46* (.04) |            |            |              |            |
| Demands must be met immediately              | .59* (.04)           | .53* (.04) |            |            |              |            |
| Often irritable                              | .68* (.03)           | .68* (.03) |            |            |              |            |
| Often offended                               | .63* (.04)           | .68* (.03) |            |            |              |            |
| Prolonged verbally aggressive tantrums       | .50* (.04)           | .71* (.03) |            |            |              |            |
| Prolonged physically aggressive tantrums     | .41* (.05)           | .60* (.05) |            |            |              |            |
| Chronically irritable mood                   | .39* (.05)           | .71* (.04) |            |            |              |            |
| Easily annoyed by others                     | .64* (.04)           | .53* (.04) |            |            |              |            |
| Often loses temper                           | .67* (.03)           | .65* (.03) |            |            |              |            |
| Stays angry <sup>a</sup>                     | .37* (.05)           | .72* (.03) |            |            |              |            |
| Is mostly angry                              | .38* (.06)           | .78* (.04) |            |            |              |            |
| Irritability causes problems                 | .72* (.03)           | .50* (.04) |            |            |              |            |
| <b>AD-Positive Emotionality</b>              |                      |            |            |            |              |            |
| Is a happy child                             | -.39* (.05)          |            | .83* (.06) |            |              |            |
| Responds positively to adults <sup>b</sup>   | -.24* (.06)          |            | .43* (.06) |            |              |            |
| Responds positively to peers <sup>b</sup>    | -.20* (.06)          |            | .50* (.07) |            |              |            |
| Verbalizes emotions                          | -.46* (.05)          |            | .48* (.06) |            |              |            |

|                                                     |             |            |
|-----------------------------------------------------|-------------|------------|
| Empathetic/caring                                   | -.39* (.05) | .51* (.06) |
| <hr/>                                               |             |            |
| AD-Exuberance                                       |             |            |
| Can modulate excitement in high-energy situations   | .66* (.04)  | .44* (.05) |
| Prone to exuberant/disruptive outbursts of emotions | .61* (.04)  | .81* (.05) |
| Overly exuberant when engaging others to play       | .46* (.05)  | .48* (.06) |
| Displays exuberance others find intrusive           | .57* (.05)  | .51* (.05) |
| <hr/>                                               |             |            |
| ADHD-Inattention                                    |             |            |
| Overlooks details                                   | .81* (.02)  |            |
| Sustained attention                                 | .89* (.02)  |            |
| Does not listen                                     | .81* (.03)  |            |
| Incomplete execution of tasks                       | .90* (.02)  |            |
| Difficulties with organization                      | .85* (.02)  |            |
| Aversion to cognitive effort                        | .89* (.02)  |            |
| Loses things                                        | .74* (.03)  |            |
| Easily distracted                                   | .92* (.02)  |            |
| Forgetful                                           | .82* (.02)  |            |
| <hr/>                                               |             |            |
| ADHD-Hyperactivity/Impulsivity                      |             |            |
| Fidgets/squirms                                     | .64* (.03)  | .48* (.04) |
| Gets up                                             | .66* (.04)  | .42* (.05) |
| Walks/climbs                                        | .69* (.04)  | .53* (.04) |
| Inner restlessness                                  | .58* (.05)  | .53* (.05) |
| Difficulties playing quietly                        | .71* (.04)  | .48* (.04) |
| Extreme agitation                                   | .70* (.04)  | .64* (.04) |
| Frequently on the go                                | .67* (.04)  | .58* (.04) |
| Blurts                                              | .65* (.04)  | .50* (.04) |
| Difficulties waiting for own turn                   | .74* (.03)  | .44* (.04) |
| Interrupts/disturbs                                 | .78* (.03)  | .42* (.04) |
| Talks a lot                                         | .53* (.04)  | .50* (.04) |
| <hr/>                                               |             |            |
| ODD-Defiant Dimension                               |             |            |

|                       |            |            |
|-----------------------|------------|------------|
| Argues with adults    | .56* (.04) | .67* (.04) |
| Does not follow rules | .63* (.04) | .66* (.04) |
| Annoys others         | .54* (.05) | .62* (.05) |
| Accuses others        | .64* (.04) | .54* (.04) |
| Spiteful/vindictive   | .42* (.06) | .62* (.07) |

*Note.* S = specific factor, ADHD = attention-deficit/hyperactivity disorder, IN = inattention, AD = affective dysregulation, II = irritability/emotional impulsivity,

PE = positive emotionality, EX = exuberance, HI = hyperactivity/impulsivity, ODD-D = oppositional defiant disorder – only defiant dimension.

\* =  $p < .001$ .

<sup>a,b</sup> Residuals of these items were allowed to correlate.



**Table S13**

*Standardized Factor Loadings (Standard Error) for the Bifactor S-1 Model (BI S-1; ADHD-HI) with ADHD-HI as Reference Factor*

| Item                                         | Reference<br>ADHD-HI | S<br>AD-II | S<br>AD-PE | S<br>AD-EX | S<br>ADHD-IN | S<br>ODD-D |
|----------------------------------------------|----------------------|------------|------------|------------|--------------|------------|
| <b>AD-Irritability/Emotional Impulsivity</b> |                      |            |            |            |              |            |
| Exhibits mood swings                         | .61* (.04)           | .66* (.03) |            |            |              |            |
| Switches easily between activities           | .44* (.04)           | .45* (.05) |            |            |              |            |
| Calms down after being angry <sup>a</sup>    | .40* (.05)           | .56* (.04) |            |            |              |            |
| Easily frustrated                            | .63* (.04)           | .51* (.04) |            |            |              |            |
| Can wait for good things                     | .66* (.03)           | .32* (.04) |            |            |              |            |
| Angry about limit-setting                    | .64* (.04)           | .52* (.04) |            |            |              |            |
| Impulsive                                    | .71* (.03)           | .39* (.04) |            |            |              |            |
| Demands must be met immediately              | .63* (.04)           | .48* (.04) |            |            |              |            |
| Often irritable                              | .69* (.03)           | .67* (.03) |            |            |              |            |
| Often offended                               | .64* (.04)           | .67* (.03) |            |            |              |            |
| Prolonged verbally aggressive tantrums       | .53* (.05)           | .70* (.04) |            |            |              |            |
| Prolonged physically aggressive tantrums     | .44* (.05)           | .58* (.05) |            |            |              |            |
| Chronically irritable mood                   | .40* (.05)           | .73* (.04) |            |            |              |            |
| Easily annoyed by others                     | .65* (.03)           | .51* (.03) |            |            |              |            |
| Often loses temper                           | .70* (.03)           | .62* (.03) |            |            |              |            |
| Stays angry <sup>a</sup>                     | .40* (.05)           | .71* (.03) |            |            |              |            |
| Is mostly angry                              | .42* (.06)           | .74* (.04) |            |            |              |            |
| Irritability causes problems                 | .74* (.03)           | .46* (.04) |            |            |              |            |
| <b>AD-Positive Emotionality</b>              |                      |            |            |            |              |            |
| Is a happy child                             | -.32* (.05)          |            | .86* (.06) |            |              |            |
| Responds positively to adults <sup>b</sup>   | -.19* (.06)          |            | .46* (.06) |            |              |            |
| Responds positively to peers <sup>b</sup>    | -.15* (.06)          |            | .54* (.07) |            |              |            |

|                                                     |             |            |
|-----------------------------------------------------|-------------|------------|
| Verbalizes emotions                                 | -.41* (.05) | .45* (.05) |
| Empathetic/caring                                   | -.34* (.05) | .44* (.05) |
| <hr/>                                               |             |            |
| AD-Exuberance                                       |             |            |
| Can modulate excitement in high-energy situations   | .70* (.04)  | .39* (.06) |
| Prone to exuberant/disruptive outbursts of emotions | .72* (.03)  | .65* (.06) |
| Overly exuberant when engaging others to play       | .60* (.04)  | .17* (.07) |
| Displays exuberance others find intrusive           | .71* (.04)  | .18* (.06) |
| <hr/>                                               |             |            |
| ADHD-Inattention                                    |             |            |
| Overlooks details                                   | .63* (.04)  | .56* (.03) |
| Sustained attention                                 | .74* (.03)  | .48* (.04) |
| Does not listen                                     | .68* (.04)  | .43* (.04) |
| Incomplete execution of tasks                       | .73* (.03)  | .54* (.04) |
| Difficulties with organization                      | .65* (.04)  | .61* (.03) |
| Aversion to cognitive effort                        | .74* (.03)  | .46* (.04) |
| Loses things                                        | .52* (.05)  | .62* (.04) |
| Easily distracted                                   | .77* (.03)  | .49* (.04) |
| Forgetful                                           | .62* (.04)  | .59* (.04) |
| <hr/>                                               |             |            |
| ADHD-Hyperactivity/Impulsivity                      |             |            |
| Fidgets/squirms                                     | .80* (.02)  |            |
| Gets up                                             | .79* (.03)  |            |
| Walks/climbs                                        | .86* (.02)  |            |
| Inner restlessness                                  | .76* (.04)  |            |
| Difficulties playing quietly                        | .86* (.02)  |            |
| Extreme agitation                                   | .92* (.02)  |            |
| Frequently on the go                                | .87* (.02)  |            |
| Blurts                                              | .81* (.03)  |            |
| Difficulties waiting for own turn                   | .87* (.02)  |            |
| Interrupts/disturbs                                 | .91* (.02)  |            |
| Talks a lot                                         | .70* (.03)  |            |
| <hr/>                                               |             |            |

---

|                       |            |            |
|-----------------------|------------|------------|
| ODD-Defiant Dimension |            |            |
| Argues with adults    | .61* (.04) | .62* (.04) |
| Does not follow rules | .65* (.04) | .65* (.04) |
| Annoys others         | .57* (.05) | .58* (.05) |
| Accuses others        | .65* (.03) | .54* (.04) |
| Spiteful/vindictive   | .49* (.06) | .53* (.07) |

---

*Note.* S = specific factor, ADHD = attention-deficit/hyperactivity disorder, HI = hyperactivity/impulsivity, AD = affective dysregulation, II = irritability/emotional impulsivity, PE = positive emotionality, EX = exuberance, ODD-D = oppositional defiant disorder – only defiant dimension.

\* =  $p < .001$ .

<sup>a,b</sup> Residuals of these items were allowed to correlate
